# Supplementary material
Source: PubMed Central journal article supplement (PMC4787578)
Supplement: shiy678920.wt1_default.pdf [file shiy678920.wt1_default.pdf]

**Web table A**

ERR by age at exposure, attained age, and sex for stroke and heart disease

|                        | Stroke |             |              | Heart disease |         |               |
|------------------------|--------|-------------|--------------|---------------|---------|---------------|
|                        | Number | %ERR/<br>Gy | 95% CI       | Number        | %ERR/Gy | 95% CI        |
| <b>Total</b>           | 9622   | 9           | (1 to 17)    | 8463          | 14      | (6 to 23)     |
| <b>Age at exposure</b> |        |             |              |               |         |               |
| <10                    | 176    | 36          | (-16 to 121) | 238           | 24      | (-14 to 85)   |
| 10-                    | 404    | 9           | (-16 to 42)  | 508           | 8       | 8 (-14 to 39) |
| 20-                    | 2,446  | 15          | (1 to 31)    | 2754          | 10      | 10 (-4 to 25) |
| >40                    | 6,596  | 5           | (-4 to 15)   | 4963          | 17      | 17 (6 to 31)  |
| Test                   |        | P>0.5       |              |               | P>0.5   |               |
| <40                    | 3026   | 15          | (2 to 29)    | 3500          | 10      | (-1 to 23)    |
| >40                    | 6596   | 5           | (-4 to 15)   | 4963          | 17      | (6 to 31)     |
| Test                   |        | P=0.26      |              |               | P=0.43  |               |
| <b>Attained age</b>    |        |             |              |               |         |               |
| <40                    | 51     | 6           | (- to 147)   | 141           | -8      | (- to 63)     |
| 40-                    | 968    | 26          | (5 to 52)    | 650           | 17      | (-5 to 47)    |
| 60-                    | 4,949  | 6           | (-4 to 17)   | 3,575         | 12      | (0 to 26)     |
| >80                    | 3,654  | 6           | (-7 to 21)   | 4,097         | 16      | (3 to 31)     |
| Test                   |        | P=0.43      |              |               | P>0.5   |               |
| <60                    | 1,019  | 25          | (4 to 50)    | 791           | 14      | (-7 to 40)    |
| >60                    | 8,603  | 6           | (-2 to 15)   | 7,672         | 14      | (5 to 24)     |
| Test                   |        | P=0.11      |              |               | P>0.5   |               |
| <b>Sex</b>             |        |             |              |               |         |               |
| Men                    | 3,958  | 11          | (0 to 22)    | 3,261         | 7       | (-4 to 20)    |
| Women                  | 5,664  | 7           | (-3 to 18)   | 5,202         | 20      | (8 to 34)     |
| Test                   |        | P>0.5       |              |               | P=0.14  |               |
