# Supplementary material
Source: PubMed Central journal article supplement (PMC4787578)
Supplement: shiy678920.wt2_default.pdf [file shiy678920.wt2_default.pdf]

**Web table B**

Summary radiation risks (ERR and EAR) for sub-categories of circulatory disease

| <b>Disease category (ICD 9<sup>TH</sup>)</b>                      | <b>Number of deaths</b> | <b>Statistical Test (p-value)</b> | <b>%ERR/Gy (95%CI)</b> | <b>EAR/10<sup>4</sup> PY-Gy (95%CI)<sup>1</sup></b> |
|-------------------------------------------------------------------|-------------------------|-----------------------------------|------------------------|-----------------------------------------------------|
| <b>Circulatory disease (390-459)</b>                              | 19,054 (100%)           | <0.001                            | 11 (5 to 17)           | 5.5 (2.7 to 8.4)                                    |
| <b>Stroke (430-438)</b>                                           | 9,622 (50.5)            | 0.02                              | 9 (1 to 17)            | 2.3 (0.4 to 4.4)                                    |
| Cerebral infarction (433,434)                                     | 2,659 (14.0)            | >0.5                              | 4 (-10 to 20)          | 0.3 (-0.7 to 1.4)                                   |
| Cerebral hemorrhage (431)                                         | 4,060 (21.3)            | 0.36                              | 5 (-6 to 17)           | 0.6 (-0.6 to 1.9)                                   |
| Subarachnoid hemorrhage (430)                                     | 461 (2.4)               | 0.09                              | 30 (-4 to 76)          | 0.4 (-0.1 to 1.0)                                   |
| Other or unspecified                                              | 2,442 (12.8)            | 0.04                              | 16 (1 to 34)           | 1.1 (0.1 to 2.2)                                    |
| <b>Heart disease (390-398, 402, 404, 410-429)</b>                 | 8,463 (44.4)            | <0.001                            | 14 (6 to 23)           | 3.2 (1.3 to 5.2)                                    |
| Ischemic Heart Disease (410-414)                                  | 3,252 (17.1)            | >0.5                              | 2 (-10 to 15)          | 0.2 (-0.9 to 1.3)                                   |
| (Myocardial Infarction) (410)                                     | (1,735 (9.1))           | (>0.5)                            | (0 (-15 to 18))        | (0.0 (-0.6 to 0.9))                                 |
| Hypertensive heart disease (402, 404)                             | 922 (4.8)               | 0.009                             | 37 (8 to 72)           | 0.9 (0.2 to 1.6)                                    |
| Rheumatic heart disease (393-398)                                 | 242 (1.3)               | 0.002                             | 86 (25 to 172)         | 0.5 (0.2 to 1.0)                                    |
| Heart failure (428)                                               | 2,983 (15.7)            | 0.003                             | 22 (7 to 39)           | 1.8 (0.6 to 3.1)                                    |
| Other heart disease                                               | 1,064 (5.6)             | >0.5                              | -1 (-21 to 24)         | 0.0 (-0.6 to 0.7)                                   |
| <b>Hypertensive disease without heart disease (401, 403, 405)</b> | 411 (2.2)               | >0.5                              | 7 (-22 to 55)          | 0.1 (-0.2 to 0.5)                                   |
| <b>Other circulatory disease</b>                                  | 558 (2.9)               | >0.5                              | -1 (-- to 34)          | 0.0 (-- to 0.5)                                     |

<sup>1</sup> The average EARs are calculated directly from the fitted ERR models.
